# Supplementary material for: A nickel nanocatalyst within a h-BN shell for enhanced hydrogen oxidation reactions
Source: PubMed Central journal article supplement — Chem Sci. 2017 Jun 9;8(8):5728–34. doi: 10.1039/c7sc01615h (PMC5621155; doi:10.1039/c7sc01615h), 2017-06-09
Supplement: SC-008-C7SC01615H-s001.pdf [file SC-008-C7SC01615H-s001.pdf]

Electronic Supporting Information for

**Nickel nanocatalyst within h-BN shell for enhanced hydrogen  
oxidation reactions**

*Lijun Gao<sup>a,b‡</sup>, Ying Wang<sup>c,‡</sup>, Haobo Li<sup>a</sup>, Qihao Li<sup>c</sup>, Na Ta<sup>a</sup>, Lin Zhuang<sup>c\*</sup>, Qiang Fu<sup>a\*</sup>, Xinhe Bao<sup>a</sup>*

*<sup>a</sup>State Key Laboratory of Catalysis, iChEM, Dalian Institute of Chemical Physics, the Chinese Academy of Sciences, Dalian 116023, P.R. China*

*<sup>b</sup>Department of Chemical Physics, University of Science and Technology of China, Hefei 230026, P.R. China*

*<sup>c</sup>College of Chemistry and Molecular Sciences, Hubei Key Lab of Electrochemical Power Sources, Institute for Advanced Studies, Wuhan university, Wuhan 430072, China*

\* Emails: [lzhuang@whu.edu.cn](mailto:lzhuang@whu.edu.cn); [qfu@dicp.ac.cn](mailto:qfu@dicp.ac.cn);

<sup>‡</sup> Both authors contribute equally

## Experimental Section

### Material synthesis

Ni nanoparticles (NPs) supported on commercial carbon (Ketjen Black EC-600JD) were prepared by an impregnation method using  $\text{Ni}(\text{NO}_3)_2 \cdot 6\text{H}_2\text{O}$  as the precursor. Before impregnation, the carbon support was calcined in air at 350 °C for 4 h. The fresh samples were dried in an oven at 120 °C overnight, and then reduced in  $\text{NH}_3$  at 500 °C for 2 h or 700 °C for 1 h. The obtained samples were named as Ni/C-500NH<sub>3</sub> and Ni/C-700NH<sub>3</sub>, respectively. Alternatively, certain amount of carbon supports and a mixed aqueous solution of  $\text{Ni}(\text{NO}_3)_2$  and boric acid ( $\text{H}_3\text{BO}_3$ ) were enclosed into a 100 ml stainless steel autoclave followed by heating at 120 °C for 10 h. After cooling to room temperature, the generated solid was dried at 40 °C overnight and then annealed at 700 °C for 1 h in  $\text{NH}_3$ . For support-free catalysts, the carbon support was not added for preparing the Ni@(h-BN) core-shell catalysts. The molecular ratio of Ni to  $\text{H}_3\text{BO}_3$  has been varied between 3:1 and 1:1, and the samples were denoted as  $\text{Ni}_3\text{@(h-BN)}_1/\text{C-700NH}_3$ ,  $\text{Ni}_1\text{(h-BN)}_1/\text{C-700NH}_3$ ,  $\text{Ni}_3\text{(h-BN)}_1\text{-700NH}_3$  and  $\text{Ni}_1\text{(h-BN)}_1\text{-700NH}_3$ . The loadings of Ni in the Ni/C-500NH<sub>3</sub>,  $\text{Ni}_3\text{(h-BN)}_1/\text{C-700NH}_3$ , and  $\text{Ni}_1\text{(h-BN)}_1/\text{C-700NH}_3$  catalysts were 27.0%, 32.5%, and 24.2%, respectively, which were measured by inductively coupled plasma optical emission spectrometer (ICP-OES, 7300DV, PerkinElmer). The three catalysts were treated by microwave digestion before the ICP-OES measurements.

### Physicochemical characterization

X-ray diffraction (XRD) patterns were collected on an Empyrean diffractometer using a Cu  $\text{K}\alpha$  ( $\lambda = 1.5406 \text{ \AA}$ ) radiation source and scanning rate of  $12^\circ \cdot \text{min}^{-1}$ . Transmission electron microscopy (TEM) images were recorded on Hitachi HT 7700 microscope operated at an acceleration voltage of 100 kV, and high-resolution electron microscopy (HRTEM) images were acquired on both JEM-2100 and FEI Technai F30 microscope operated at an accelerating voltage of 200 kV and 300 kV, respectively. Raman measurements were undertaken on a LabRam HR 800 instrument with a 532 nm excitation laser. X-ray photoelectron spectroscopy (XPS) measurements were performed in a Thermo Scientific ESCALAB 250Xi spectrometer using an Al  $\text{K}\alpha$  X-ray source and 20 eV pass energy. The C 1s peak located at 284.5 eV was used for calibration of binding energy positions. Infrared

spectroscopic measurement was recorded on Nicolet isso FT-IR spectrometer with a spectral resolution of  $4\text{ cm}^{-1}$  accumulating 32 scans.  $\text{H}_2$  pulse chemisorption was done using a Micromeritics Chemisorption Analyzer (Auto Chem II 2920). The samples were pretreated in 10% (v/v)  $\text{H}_2$ -Ar ( $50\text{ mL}\cdot\text{min}^{-1}$ ) at  $210\text{ }^\circ\text{C}$  for 2 h and then changed to He ( $50\text{ mL}\cdot\text{min}^{-1}$ ) to purge the chemisorbed hydrogen on samples at  $450\text{ }^\circ\text{C}$  (for Ni/C-500 $\text{NH}_3$  catalysts) or  $600\text{ }^\circ\text{C}$  (for Ni@h-BN/C catalysts) for 80 min. After cooling down to  $40\text{ }^\circ\text{C}$ , the samples were exposed to  $\text{H}_2$  pulses consisting of 10% (v/v)  $\text{H}_2$  balanced with Ar ( $50\text{ mL}\cdot\text{min}^{-1}$ ).  $\text{H}_2$  concentration was measured using a thermal conducting detector (TCD). Temperature-programmed oxidation (TPO) was carried out in a home-made micro-reactor equipped with a mass spectrometer (OMNI STAR). The catalysts were firstly reduced in  $\text{H}_2$  ( $50\text{ mL}\cdot\text{min}^{-1}$ ) at  $500\text{ }^\circ\text{C}$  for 2 h and then cooled down to room temperature in He. The reduced catalysts were heated in 20% (v/v)  $\text{O}_2$ -He ( $30\text{ mL}\cdot\text{min}^{-1}$ ) from room temperature to  $800\text{ }^\circ\text{C}$  with a ramping rate of  $5\text{ }^\circ\text{C}\cdot\text{min}^{-1}$ . The products were analyzed by an on-line mass spectrometer.

### **Electrochemical measurements**

Electrochemical experiments were conducted on a CHI-600E potentiostat with a rotating disk electrode (RDE) system (Pine Research Instruments). A sheet of carbon paper (Toray) was used as the counter electrode. The reference electrode was a reversible hydrogen electrode (RHE) in the same solution. 5 mg sample was dispersed ultrasonically in 1 ml diluted Nafion alcohol solution (0.05 wt. %) to form an ink, and the suspension was pipetted onto a RDE with a glassy carbon (GC) substrate ( $\phi = 5\text{ mm}$ ), which was buff-polished with an alumina suspension ( $\phi = 0.05\text{ }\mu\text{m}$ ) prior to use. The catalyst coated electrode was dried under an infrared lamp, and the Ni loading is  $0.25\text{ mg}_{\text{Ni}}\cdot\text{cm}^{-2}$ . The hydrogen oxidation reaction (HOR) evaluation was carried out in  $\text{H}_2$ -saturated 0.1 M NaOH solution with the rotation rate of 2500 revolutions per minute (r.p.m). The potential was scanned from  $-0.05\text{ V}$  to  $0.15\text{ V}$  (vs. RHE) at  $5\text{ mV}\cdot\text{s}^{-1}$ . Cyclic voltammetry (CV) was carried out in  $\text{N}_2$ -saturated 0.1 M NaOH solution by scanning the potential from  $-0.05\text{ V}$  to  $0.50\text{ V}$  (vs. RHE) at  $20\text{ mV}\cdot\text{s}^{-1}$ . The accelerated durability tests (ADTs) were conducted in 0.1 M NaOH solution by scanning the potential from  $-0.05$  to  $0.5\text{ V}$  (vs. RHE) at  $100\text{ mV}\cdot\text{s}^{-1}$  for 10000 cycles.

### **Computational details**

Density functional theory (DFT) calculations were performed using Vienna ab initio simulation packages (VASP)<sup>1</sup> with the projector-augmented wave (PAW) scheme<sup>2</sup>. The Perdew-Burke-

Ernzerhof (PBE)<sup>3</sup> functional at the level of Generalized Gradient Approximation (GGA) for electronic exchange-correlation interactions has been used. The plane wave cutoff was set to 400 eV. The Brillouin zone was sampled by a 2×2×1 Monkhorst-Pack<sup>4</sup> k-point grid for structural optimizations. The convergence of energy and forces were set to  $1 \times 10^{-5}$  eV and  $0.05 \text{ eV} \cdot \text{\AA}^{-1}$ . The weak van der Waals (vdW) interactions were corrected in the form of  $C^6/R^6$  pair potentials (PEB-D)<sup>5</sup>, where  $C^6$  for Ni, N, B, H, and O were set to 10.80, 1.23, 3.13, 0.14, and 0.70, and  $R^{\text{vdW}}$  were set to 1.562, 1.397, 1.485, 1.001, and 1.342, respectively.  $\Delta E_{\text{H}}$  is defined by:  $\Delta E_{\text{H}} = E_{\text{surface+H}} - E_{\text{surface}} - \mu_{\text{H}}$ , and  $\Delta E_{\text{O}}$  is defined by:  $\Delta E_{\text{O}} = E_{\text{surface+O}} - E_{\text{surface}} - \mu_{\text{O}}$ , where  $E_{\text{surface+H}}$  or  $E_{\text{surface+O}}$  is the total energy for the surface with adsorbed H or O atoms,  $E_{\text{surface}}$  is the total energy for the h-BN/Ni surface, and  $\mu_{\text{H}}$  or  $\mu_{\text{O}}$  is the chemical potential of H or O with reference to  $\text{H}_2$  or  $\text{O}_2$ :  $\mu_{\text{H}} = 1/2\mu(\text{H}_2)$ ,  $\mu_{\text{O}} = 1/2\mu(\text{O}_2)$ .  $\Delta E_{\text{OH}}$  is defined by:  $\Delta E_{\text{OH}} = E_{\text{surface+OH}} - E_{\text{surface}} - \mu_{\text{OH}}$ , where  $E_{\text{surface+OH}}$  is the total energy for the surface with adsorbed OH groups,  $E_{\text{surface}}$  is the total energy for the h-BN/Ni surface, and  $\mu_{\text{OH}}$  is the chemical potential of OH groups with reference to  $\text{H}_2\text{O}$  and  $\text{H}_2$ :  $\mu_{\text{OH}} = \mu(\text{H}_2\text{O}) - 1/2\mu(\text{H}_2)$ .

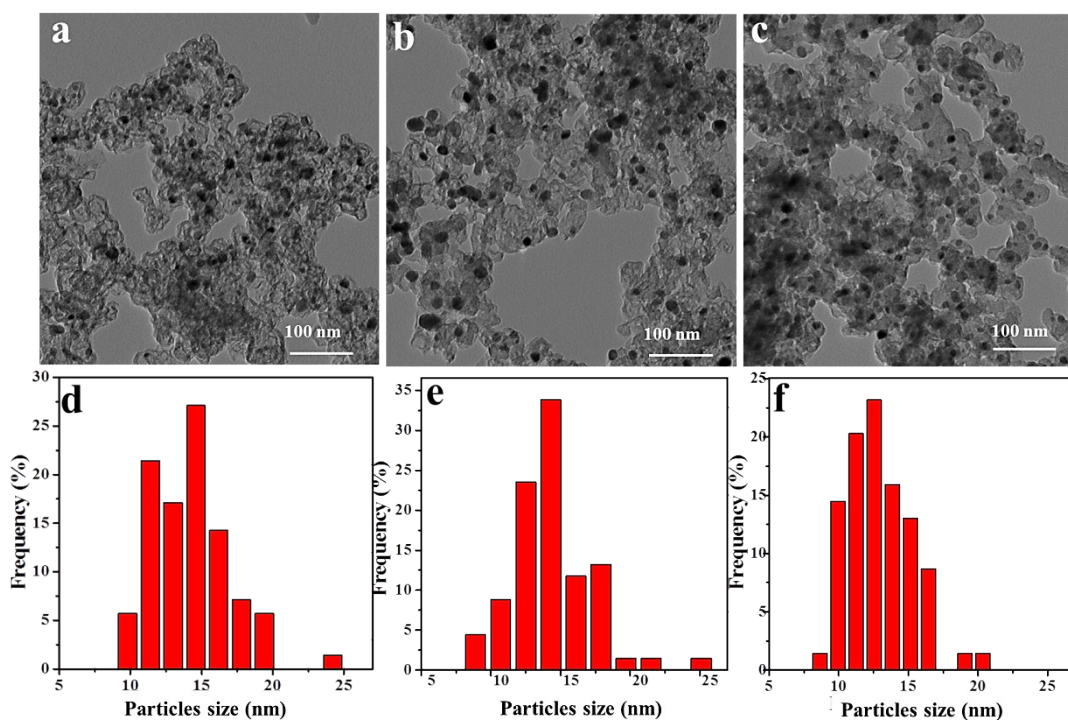

Fig. S1 TEM images and corresponding Ni particles size distributions of Ni/C-500NH<sub>3</sub> (a, d), Ni<sub>3</sub>@(h-BN)<sub>1</sub>/C-700NH<sub>3</sub> (b, e), and Ni<sub>1</sub>@(h-BN)<sub>1</sub>/C-700NH<sub>3</sub> (c, f) samples. The Ni/C-500NH<sub>3</sub> and Ni@h-BN/C samples show uniform size distribution of nanoparticles with an average diameter between 10 and 15 nm. Comparing with Ni/C-500NH<sub>3</sub>, Ni nanoparticles in the Ni@h-BN/C catalysts did not sinter although the samples were treated at the higher temperature (700 °C).

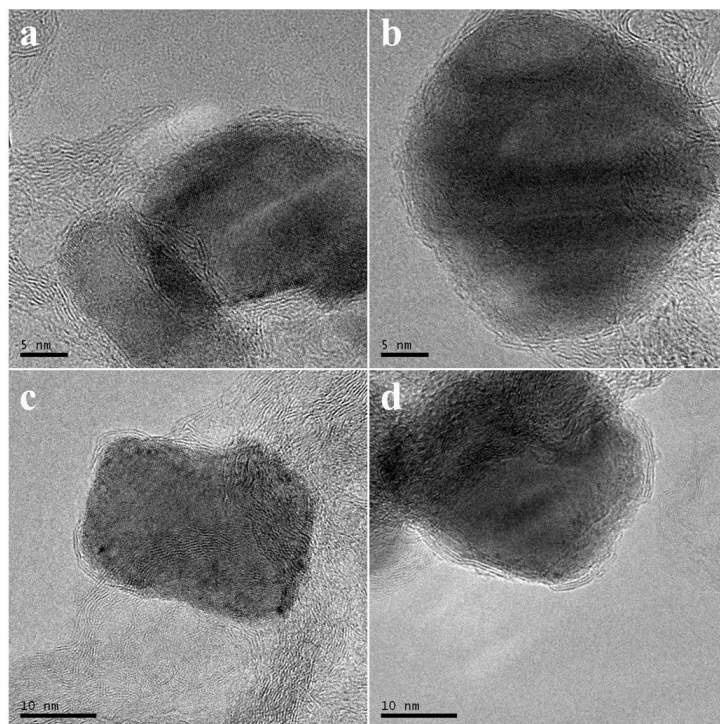

Fig. S2 HRTEM image of the  $\text{Ni}_3@(\text{h-BN})_1/\text{C-700NH}_3$  (a-b) and  $\text{Ni}_1@(\text{h-BN})_1/\text{C-700NH}_3$  (c-d) catalysts. In the  $\text{Ni}@(\text{h-BN})/\text{C}$  samples, the NPs have been covered by graphitic overlayers.

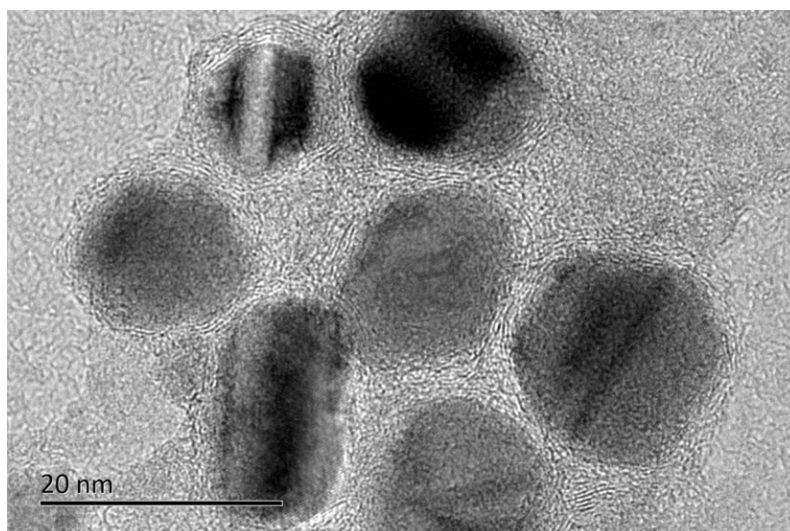

Fig. S3 HRTEM image of the calcinated  $\text{Ni}_1@(\text{h-BN})_1/\text{C-700NH}_3$  catalyst. A  $\text{Ni}_1@(\text{h-BN})_1/\text{C-700NH}_3$  sample was calcinated at 550 °C in air to remove the carbon support. The calcinated  $\text{Ni}_1@(\text{h-BN})_1/\text{C-700NH}_3$  catalyst contains similar core-shell nanostructures but the Ni cores were covered by thick and intact h-BN overlayers.

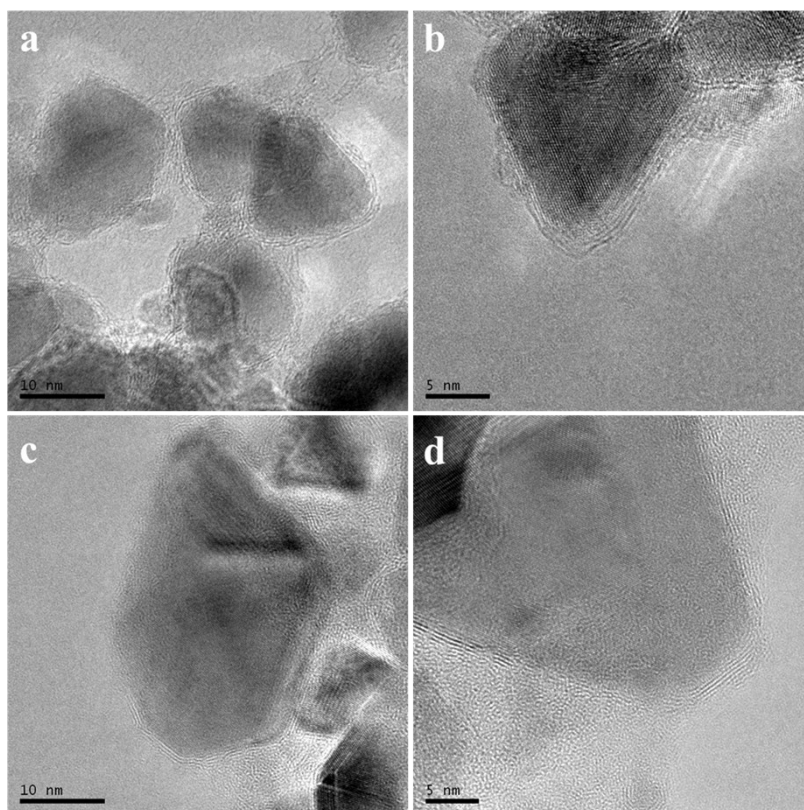

Fig. S4 HRTEM images of support-free  $\text{Ni}_3@(\text{h-BN})_1-700\text{NH}_3$  (a, b) and  $\text{Ni}_1@(\text{h-BN})_1-700\text{NH}_3$  (c, d) catalysts. The support-free Ni@h-BN catalysts were synthesized by the same procedure but without adding the carbon supports.



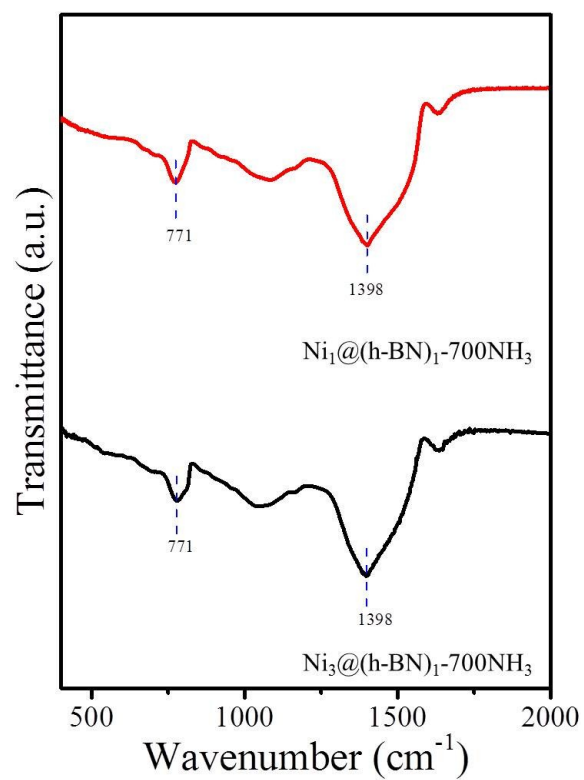

Fig. S5 Infrared spectra recorded from the  $\text{Ni}_3@(\text{h-BN})_1-700\text{NH}_3$  and  $\text{Ni}_1@(\text{h-BN})_1-700\text{NH}_3$  catalysts.

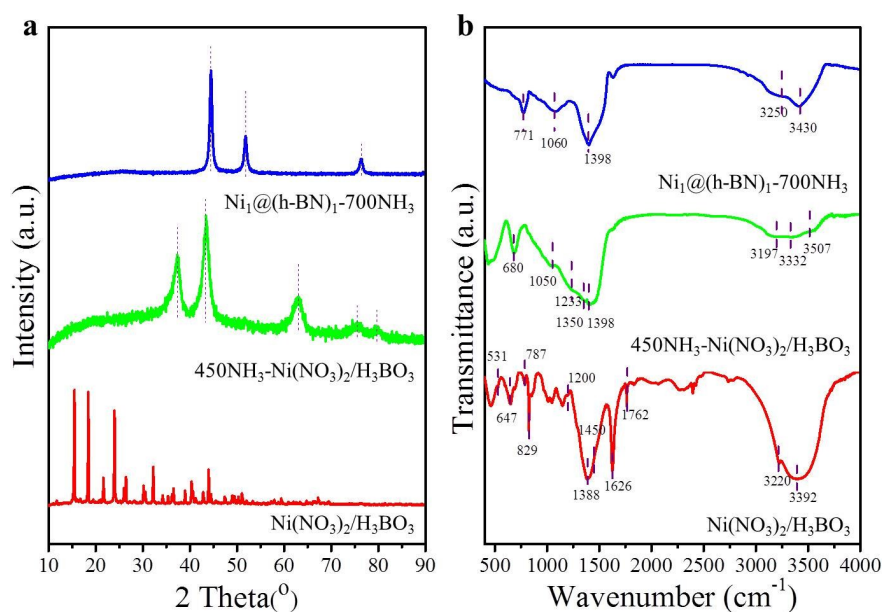

Fig. S6 XRD patterns and IR spectra of  $\text{Ni}(\text{NO}_3)_2/\text{H}_3\text{BO}_3$ ,  $450\text{NH}_3-\text{Ni}(\text{NO}_3)_2$  and  $\text{Ni}_1@(\text{h-BN})_1-700\text{NH}_3$ . The XRD patterns show the formation of  $\text{Ni}(\text{NO}_3)_2 \cdot 2\text{H}_2\text{O}$  (PDF 01-071-1840) after the impregnation.  $\text{Ni}(\text{NO}_3)_2 \cdot 2\text{H}_2\text{O}$  decomposed to  $\text{NiO}$  at 450 °C and then reduced to metallic  $\text{Ni}$  at 700 °C. In IR spectra, adsorption bands at 1450, 1200, 787, 647, and 531  $\text{cm}^{-1}$  can be attributed to B-O, B-O-H, B-O-B,  $\text{BO}_3$ , and O-B-O groups respectively in the as-prepared sample. The 3220 and 3392  $\text{cm}^{-1}$  bands were attributed to O-H and crystal water.<sup>6</sup> The bands at 829, 1388, 1626 and 1762  $\text{cm}^{-1}$  were attributed to  $\text{NO}_3^{2-}$  group from  $\text{Ni}(\text{NO}_3)_2$ .<sup>7</sup> After treating by  $\text{NH}_3$  at 450 °C for 1h, the bands from  $\text{NO}_3^{2-}$  group disappeared. Meanwhile, boric acid decomposed into boric oxide. The 1233, 1350 and 1398  $\text{cm}^{-1}$  was attributed to B-O groups. The 1050  $\text{cm}^{-1}$  may be attributed to boron oxynitride species, and 680  $\text{cm}^{-1}$  was attributed to  $\text{BO}_3$  group. The 3507 and 3332  $\text{cm}^{-1}$  were due to  $\text{NH}_2$  species, while the 3197 $\text{cm}^{-1}$  may be due to OH species<sup>6</sup>. When the sample was treated by  $\text{NH}_3$  at 700 °C for 1 h, the IR spectra show two characteristic peaks of h-BN at 1398  $\text{cm}^{-1}$  for in-plane B-N and 771  $\text{cm}^{-1}$  for out-of-plane B-N-B. The 1060  $\text{cm}^{-1}$  band may be attributed to boron oxynitride species<sup>6</sup>. The XRD and IR spectra results indicated that  $\text{NH}_3$  can reduce  $\text{Ni}(\text{NO}_3)_2$  and  $\text{H}_3\text{BO}_3$  to metallic  $\text{Ni}$  and h-BN at 700 °C after 1 h. The formation of  $\text{Ni}$  and h-BN happened at the same time.

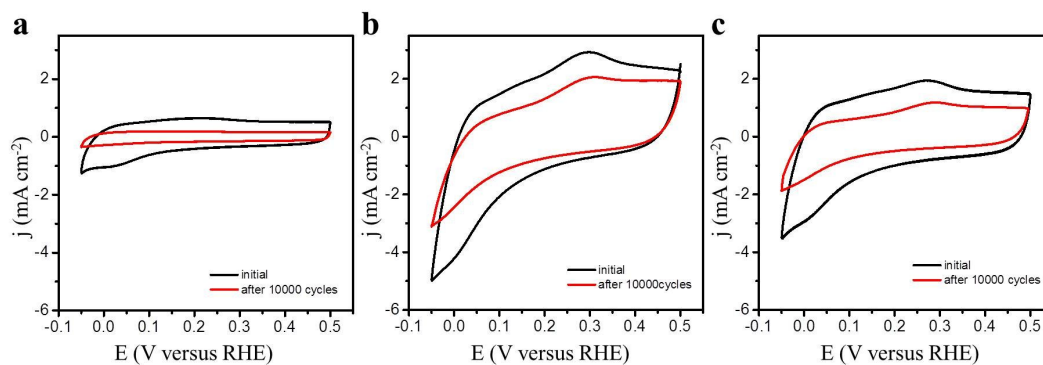

Fig. S7 Cyclic Voltammetry of the (a) Ni/C-500NH<sub>3</sub>, (b) Ni<sub>3</sub>@(h-BN)<sub>1</sub>/C-700NH<sub>3</sub>, and (c) Ni<sub>1</sub>@(h-BN)<sub>1</sub>/C-700NH<sub>3</sub> samples in N<sub>2</sub>-saturated 0.1 M NaOH solution, at 20 mV·s<sup>-1</sup> before (black) and after (red) ADTs.

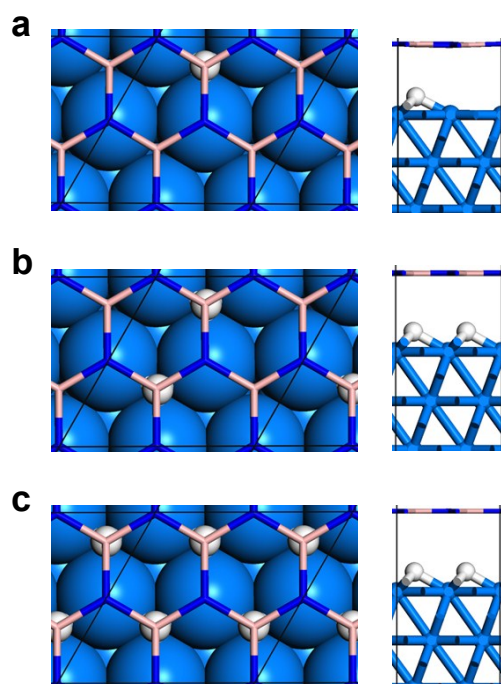

Fig. S8 Atomic structure diagrams of the optimized adsorption structures in figure 4a: H atom adsorption at the interface of h-BN/Ni(111) with the coverage of 1/4 ML (a), 1/2 ML (b), and 1 ML (c).

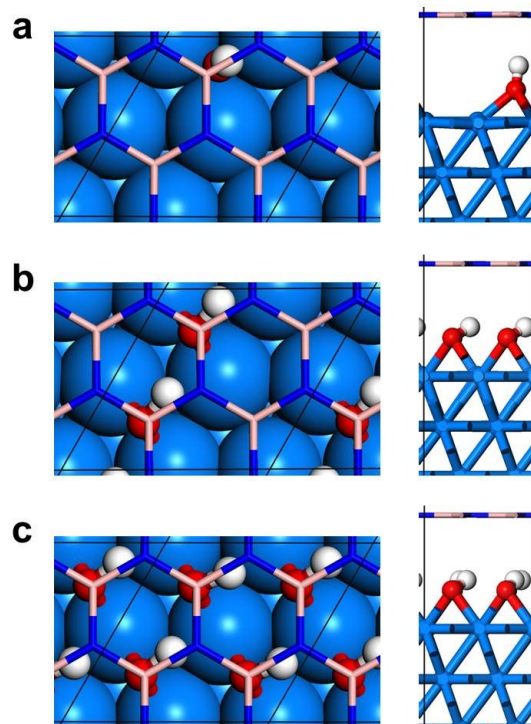

Fig. S9 Atomic structure diagrams of the optimized adsorption structures in figure 4b: OH adsorption at the interface of h-BN/Ni(111) with the coverage of 1/4 ML (a), 1/2 ML (b), and 1 ML (c).

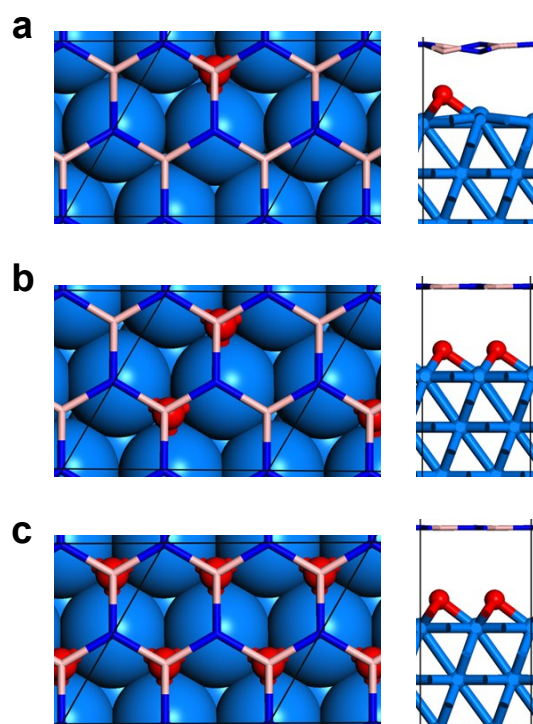

Fig. S10 Atomic structure diagrams of the optimized adsorption structures in figure 4c: O atom adsorption at the interface of h-BN/Ni(111) with the coverage of 1/4 ML (a), 1/2 ML (b), and 1 ML (c).

## Reference

1. G. Kresse and J. Furthmüller, *Phys. Rev. B*, 1996, **54**, 11169-11186.
2. P. E. Blöchl, *Phys. Rev. B*, 1994, **50**, 17953-17979.
3. J. P. Perdew, K. Burke and M. Ernzerhof, *Phys. Rev. Lett.*, 1996, **77**, 3865-3868.
4. H. J. Monkhorst and J. D. Pack, *Phys. Rev. B*, 1976, **13**, 5188-5192.
5. S. Grimme, *J. Comput. Chem.*, 2006, **27**, 1787-1799.
6. X. Gouin, P. Grange, L. Bois, P. L'Haridon and Y. Laurent, *J. Alloys Compd.*, 1995, **224**, 22-28.
7. F. Vratny, *Appl. Spectrosc.*, 1959, **13**, 59-70.
